# Supplementary material for: Constitution of a comprehensive phytochemical profile and network pharmacology based investigation to decipher molecular mechanisms of Teucrium polium L. in the treatment of type 2 diabetes mellitus
Source: PeerJ. 2020 Oct 22;8:e10111. doi: 10.7717/peerj.10111 (PMC7585722; doi:10.7717/peerj.10111)
Supplement: Supplemental Information 2 [file peerj-08-10111-s002.xlsx]

## Sheet: Page 1
Gene Symbol	Gene Name	Uniprot ID	Degree
CA12	Carbonic anhydrase XII	O43570	31
ESR2	Estrogen receptor beta	Q92731	34
PTGS2	Prostaglandin G/H synthase 2	P35354	44
CA4	Carbonic anhydrase IV	P22748	30
CYP19A1	Cytochrome P450 19A1	P11511	32
AR	Androgen Receptor	P10275	33
CA1	Carbonic anhydrase I	P00915	30
CA2	Carbonic anhydrase II	P00918	30
CA9	Carbonic anhydrase IX	Q16790	29
CA7	Carbonic anhydrase VII	P43166	29
ESR1	Estrogen receptor alpha	P03372	31
BACE1	Beta-secretase 1	P56817	28
CA14	Carbonic anhydrase XIV	Q9ULX7	28
PARP1	Poly [ADP-ribose] polymerase-1	P09874	29
EGFR	Epidermal growth factor receptor erbB1	P00533	29
CA3	Carbonic anhydrase III	P07451	27
CA13	Carbonic anhydrase XIII (by homology)	Q8N1Q1	27
CA6	Carbonic anhydrase VI	P23280	27
AKR1B10	Aldo-keto reductase family 1 member B10	O60218	27
MMP9	Matrix metalloproteinase 9	P14780	30
ALOX5	Arachidonate 5-lipoxygenase	P09917	27
MMP2	Matrix metalloproteinase 2	P08253	28
PIM1	Serine/threonine-protein kinase PIM1	P11309	25
APP	Beta amyloid A4 protein	P05067	26
GSK3B	Glycogen synthase kinase-3 beta	P49841	29
HSD17B2	Estradiol 17-beta-dehydrogenase 2	P37059	24
MAOA	Monoamine oxidase A	P21397	25
MMP3	Matrix metalloproteinase 3	P08254	24
ACHE	Acetylcholinesterase	P22303	25
ADORA2A	Adenosine A2a receptor (by homology)	P29274	23
PYGL	Liver glycogen phosphorylase	P06737	22
PTGS1	Cyclooxygenase-1	P23219	25
NOS2	Nitric oxide synthase, inducible	P35228	28
HSP90AB1	Heat shock protein HSP 90	P08238	21
KDR	Vascular endothelial growth factor receptor 2	P35968	21
MMP13	Matrix metalloproteinase 13	P45452	21
OPRM1	Mu opioid receptor (by homology)	P35372	21
KDM4E	Lysine-specific demethylase 4D-like	B2RXH2	21
AKR1B1	Aldose reductase (by homology)	P15121	22
ADORA1	Adenosine A1 receptor (by homology)	P30542	21
MET	Hepatocyte growth factor receptor	P08581	21
CDK2	Cell division protein kinase 2	P24941	25
CDK1	Cyclin-dependent kinase 1	P06493	21
AKR1C3	Aldo-keto-reductase family 1 member C3	P42330	19
CA5A	Carbonic anhydrase VA	P35218	19
TERT	Telomerase reverse transcriptase	O14746	19
FLT3	Tyrosine-protein kinase receptor FLT3	P36888	19
SYK	Tyrosine-protein kinase SYK	P43405	19
ABCB1	P-glycoprotein 1	P08183	19
ADORA3	Adenosine A3 receptor	P0DMS8	19
MAPK1	MAP kinase ERK2	P28482	18
HSD11B1	11-beta-hydroxysteroid dehydrogenase 1	P28845	18
MPO	Myeloperoxidase	P05164	19
AURKB	Serine/threonine-protein kinase Aurora-B	Q96GD4	18
TTR	Transthyretin	P02766	18
GLO1	Glyoxalase I	Q04760	18
ALOX15	Arachidonate 15-lipoxygenase	P16050	18
OPRD1	Delta opioid receptor (by homology)	P41143	18
CYP1B1	Cytochrome P450 1B1	Q16678	19
GPR35	G-protein coupled receptor 35	Q9HC97	17
F2	Thrombin	P00734	18
ALOX12	Arachidonate 12-lipoxygenase	P18054	17
SRC	Tyrosine-protein kinase SRC	P12931	17
PTPN1	Protein-tyrosine phosphatase 1B	P18031	17
ARG1	Arginase-1 (by homology)	P05089	17
ABCC1	Multidrug resistance-associated protein 1	P33527	17
PTPRS	Receptor-type tyrosine-protein phosphatase S	Q13332	17
XDH	Xanthine dehydrogenase	P47989	19
TNKS	Tankyrase-1	O95271	17
TNKS2	Tankyrase-2	Q9H2K2	17
NOX4	NADPH oxidase 4	Q9NPH5	17
HSD17B1	Estradiol 17-beta-dehydrogenase 1	P14061	17
ABCG2	ATP-binding cassette sub-family G member 2	Q9UNQ0	18
JAK1	Tyrosine-protein kinase JAK1	P23458	16
LRRK2	Leucine-rich repeat serine/threonine-protein kinase 2	Q5S007	16
MMP1	Matrix metalloproteinase 1	P03956	16
MMP12	Matrix metalloproteinase 12	P39900	16
MAOB	Monoamine oxidase B	P27338	18
BRD4	Bromodomain-containing protein 4	O60885	15
NEK6	Serine/threonine-protein kinase NEK6	Q9HC98	15
PLK1	Serine/threonine-protein kinase PLK1	P53350	15
PTK2	Focal adhesion kinase 1	Q05397	15
NCOA2	Nuclear receptor coactivator 2	Q15596	15
PRSS1	Trypsin-1	P07477	18
AKR1C1	Aldo-keto reductase family 1 member C1 (by homology)	Q04828	15
CAMK2B	CaM kinase II beta	Q13554	15
DRD4	Dopamine D4 receptor	P21917	15
TOP1	DNA topoisomerase I	P11387	17
CD38	Lymphocyte differentiation antigen CD38	P28907	15
AHR	Aryl hydrocarbon receptor	P35869	16
PLG	Plasminogen	P00747	15
KIT	Stem cell growth factor receptor	P10721	15
CSNK2A1	Casein kinase II alpha	P68400	15
JAK3	Tyrosine-protein kinase JAK3	P52333	14
TYK2	Tyrosine-protein kinase TYK2	P29597	14
JAK2	Tyrosine-protein kinase JAK2	O60674	14
PLA2G1B	Phospholipase A2 group 1B	P04054	14
ALK	ALK tyrosine kinase receptor	Q9UM73	14
DPP4	Dipeptidyl peptidase IV	P27487	14
TYR	Tyrosinase	P14679	15
CDK6	Cyclin-dependent kinase 6	Q00534	15
GRK6	G protein-coupled receptor kinase 6	P43250	14
LCK	Tyrosine-protein kinase LCK	P06239	14
AMY1A	Alpha-amylase 1	P04745	14
CA5B	Carbonic anhydrase VB	Q9Y2D0	13
TOP2A	DNA topoisomerase II alpha	P11388	14
AKR1A1	Aldehyde reductase (by homology)	P14550	13
AKT1	Serine/threonine-protein kinase AKT	P31749	16
DAPK1	Death-associated protein kinase 1	P53355	13
CFTR	Cystic fibrosis transmembrane conductance regulator	P13569	13
CDK5R1 CDK5	Cyclin-dependent kinase 5/CDK5 activator 1	Q15078 Q00535	13
NR3C1	Glucocorticoid receptor	P04150	12
HMOX1	Heme oxygenase 1 (by homology)	P09601	12
PGR	Progesterone receptor	P06401	12
CDK5R1	Cyclin-dependent kinase 5/CDK5 activator 1	Q15078	12
NUAK1	NUAK family SNF1-like kinase 1	O60285	12
PKN1	Protein kinase N1	Q16512	12
PIK3R1	PI3-kinase p85-alpha subunit	P27986	12
IGF1R	Insulin-like growth factor I receptor	P08069	13
AKR1C4	Aldo-keto reductase family 1 member C4 (by homology)	P17516	12
APEX1	DNA-(apurinic or apyrimidinic site) lyase	P27695	12
PIK3CG	PI3-kinase p110-gamma subunit	P48736	13
SIGMAR1	Sigma opioid receptor	Q99720	12
MCL1	Induced myeloid leukemia cell differentiation protein Mcl-1	Q07820	12
CDK1	Cyclin-dependent kinase 1/cyclin B	P06493	12
SLC6A2	Norepinephrine transporter	P23975	13
SHBG	Testis-specific androgen-binding protein	P04278	11
MAPK14	MAP kinase p38 alpha	Q16539	11
SLC22A12	Solute carrier family 22 member 12	Q96S37	11
CHEK1	Serine/threonine-protein kinase Chk1	O14757	11
CALM3	Calmodulin	P0DP25	12
AKR1C2	Aldo-keto reductase family 1 member C2 (by homology)	P52895	11
ESRRA	Estrogen-related receptor alpha	P11474	11
ODC1	Ornithine decarboxylase	P11926	11
MPG	DNA-3-methyladenine glycosylase	P29372	11
BCHE	Butyrylcholinesterase	P06276	11
NR1H3	LXR-alpha	Q13133	10
BRD2	Bromodomain-containing protein 2	P25440	10
DRD2	Dopamine D2 receptor (by homology)	P14416	10
CXCR1	Interleukin-8 receptor A	P25024	10
NEK2	Serine/threonine-protein kinase NEK2	P51955	10
AVPR2	Vasopressin V2 receptor	P30518	10
SLC6A4	Serotonin transporter	P31645	10
SCN5A	Sodium Channel Protein Type 5 Subunit Alpha	Q14524	10
ST6GAL1	Beta-galactoside alpha-2,6-sialyltransferase 1	P15907	10
CBR1	Carbonyl reductase [NADPH] 1	P16152	10
NAE1	NEDD8-activating enzyme E1 regulatory subunit	Q13564	10
SLC6A3	Dopamine transporter	Q01959	10
CYP11B2	Cytochrome P450 11B2	P19099	9
CYP11B1	Cytochrome P450 11B1	P15538	9
CDC7	CDC7/DBF4 (Cell division cycle 7-related protein kinase/Activator of S phase kinase)	O00311	9
SERPINA6	Corticosteroid binding globulin	P08185	9
TAAR1	Trace amine-associated receptor 1 (by homology)	Q96RJ0	9
PDE10A	Phosphodiesterase 10A (by homology)	Q9Y233	9
CYP2C19	Cytochrome P450 2C19	P33261	9
CYP17A1	Cytochrome P450 17A1	P05093	9
CASP3	Caspase-3	P42574	9
AXL	Tyrosine-protein kinase receptor UFO	P30530	9
PFKFB3	6-phosphofructo-2-kinase/fructose-2,6-bisphosphatase 3	Q16875	9
BCL2L1	Apoptosis regulator Bcl-X	Q07817	9
CHRM2	Muscarinic acetylcholine receptor M2	P08172	9
ICMT	Isoprenylcysteine carboxyl methyltransferase	O60725	8
ABCC9	Sulfonylurea receptor 2	O60706	8
NPC1L1	Niemann-Pick C1-like protein 1	Q9UHC9	8
FKBP1A	FK506-binding protein 1A	P62942	8
EPHX2	Epoxide hydratase	P34913	8
CHRM3	Muscarinic acetylcholine receptor M3	P20309	8
NR1I3	Nuclear receptor subfamily 1 group I member 3 (by homology)	Q14994	8
POLB	DNA polymerase beta	P06746	8
PLA2G2A	Phospholipase A2 group IIA	P14555	8
LTA4H	Leukotriene A4 hydrolase	P09960	8
CHRM1	Muscarinic acetylcholine receptor M1	P11229	8
CCNB3 CDK1 CCNB1 CCNB2	Cyclin-dependent kinase 1/cyclin B	Q8WWL7 P06493 P14635 O95067	7
UGT2B7	UDP-glucuronosyltransferase 2B7	P16662	7
TYMS	Thymidylate synthase	P04818	7
KCNJ11 ABCC9	Sulfonylurea receptor 2, Kir6.2	Q14654 O60706	7
AOC3	Amine oxidase, copper containing	Q16853	7
PTPN2	T-cell protein-tyrosine phosphatase	P17706	7
HMGCR	HMG-CoA reductase	P04035	7
NR3C2	Mineralocorticoid receptor	P08235	7
MAP2K1	Dual specificity mitogen-activated protein kinase kinase 1	Q02750	7
PTGES	Prostaglandin E synthase	O14684	7
PPARD	Peroxisome proliferator-activated receptor delta	Q03181	7
TNF	TNF-alpha	P01375	7
MDM2	p53-binding protein Mdm-2	Q00987	7
MMP8	Matrix metalloproteinase 8	P22894	7
PPARG	Peroxisome proliferator-activated receptor gamma	P37231	7
ADRB2	Beta-2 adrenergic receptor	P07550	7
ADRA2A	Alpha-2a adrenergic receptor	P08913	7
CYP51A1	Cytochrome P450 51	Q16850	6
RORA	Nuclear receptor ROR-alpha	P35398	6
PDE7A	Phosphodiesterase 7A	Q13946	6
PRKCD	Protein kinase C delta	Q05655	6
HSD11B2	11-beta-hydroxysteroid dehydrogenase 2	P80365	6
IMPDH2	Inosine-5'-monophosphate dehydrogenase 2	P12268	6
OPRK1	Kappa Opioid receptor	P41145	6
MYLK	Myosin light chain kinase, smooth muscle	Q15746	6
KCNH2	Potassium voltage-gated channel subfamily H member 2	Q12809	6
CYP2C9	Cytochrome P450 2C9	P11712	6
INSR	Insulin receptor	P06213	7
NOS3	Nitric-oxide synthase, endothelial	P29474	6
F7	Coagulation factor VII	P08709	6
CALM1	Calmodulin	P62158	7
NCOA1	nuclear receptor coactivator 1	Q15788	6
MAPT	Microtubule-associated protein tau	P10636	6
ADRA1B	Alpha-1B adrenergic receptor	P35368	6
RELA	RELA proto-oncogene, NF-kB subunit	Q04206	6
TRPV3	Transient receptor potential cation channel subfamily V member 3	Q8NET8	5
KCNA5	Voltage-gated potassium channel subunit Kv1.5	P22460	5
PTPN6	Protein-tyrosine phosphatase 1C	P29350	5
RORC	Nuclear receptor ROR-gamma	P51449	5
CES2	Carboxylesterase 2	O00748	5
G6PD	Glucose-6-phosphate 1-dehydrogenase	P11413	5
IDO1	Indoleamine 2,3-dioxygenase	P14902	5
FNTA FNTB	Protein farnesyltransferase	P49354 P49356	5
EIF2AK3	Eukaryotic translation initiation factor 2-alpha kinase 3	Q9NZJ5	5
PIM3	Serine/threonine-protein kinase PIM3	Q86V86	5
CHRM4	Muscarinic acetylcholine receptor M4	P08173	5
BACE2	Beta secretase 2	Q9Y5Z0	5
PTPN11	Protein-tyrosine phosphatase 2C	Q06124	5
MTOR	Serine/threonine-protein kinase mTOR	P42345	5
IRAK4	Interleukin-1 receptor-associated kinase 4	Q9NWZ3	5
PIK3CA	PI3-kinase p110-alpha subunit	P42336	5
JUN	Proto-oncogene c-JUN	P05412	5
IL2	Interleukin-2	P60568	5
CDC25A	Dual specificity phosphatase Cdc25A	P30304	5
TP53	Tumor Protein P53	P04637	5
TPMT	Thiopurine S-methyltransferase	P51580	5
KDM4C	Lysine-specific demethylase 4C	Q9H3R0	5
STAT3	Signal transducer and activator of transcription 3	P40763	5
F10	Coagulation factor Xa	P00742	5
ADRA2C	Adrenergic receptor alpha-2	P18825	5
ADRA1A	Alpha-1a adrenergic receptor	P35348	5
SREBF2	Sterol regulatory element-binding protein 2	Q12772	4
MMP7	Matrix metalloproteinase 7	P09237	4
MMP14	Matrix metalloproteinase 14	P50281	4
CHRM5	Muscarinic acetylcholine receptor M5	P08912	4
CD81	CD81 antigen	P60033	4
ACP1	Low molecular weight phosphotyrosine protein phosphatase	P24666	4
PTPRF	Receptor-type tyrosine-protein phosphatase F (LAR)	P10586	4
LIPA	Lysosomal acid lipase/cholesteryl ester hydrolase	P38571	4
SLC22A6	Solute carrier family 22 member 6 (by homology)	Q4U2R8	4
PTGFR	Prostanoid FP receptor	P43088	4
ADAM17	Disintegrin and metalloproteinase domain-containing protein 17	P78536	4
EDNRA	Endothelin receptor ET-A (by homology)	P25101	4
P2RX7	P2X purinoceptor 7	Q99572	4
PRKCQ	Protein kinase C theta	Q04759	4
HCRTR2	Orexin receptor 2	O43614	4
CREBBP	CREB-binding protein/p53	Q92793	4
CNR2	Cannabinoid receptor 2	P34972	4
GBA	Beta-glucocerebrosidase (by homology)	P04062	4
MME	Neprilysin	P08473	4
DYRK1A	Dual-specificity tyrosine-phosphorylation regulated kinase 1A	Q13627	4
PSMB8	Proteasome subunit beta type-8	P28062	4
P2RX3	P2X purinoceptor 3	P56373	4
PRKCB	Protein kinase C beta	P05771	4
PRKCA	Protein kinase C alpha	P17252	4
PPARA	Peroxisome proliferator-activated receptor alpha	Q07869	4
GSTP1	Glutathione S-transferase Pi	P09211	4
CASP7	Caspase-7	P55210	4
VEGFA	Vascular endothelial growth factor A	P15692	4
RB1	Retinoblastoma-associated protein	P06400	4
ICAM1	Intercellular adhesion molecule-1	P05362	4
CDKN1A	Cyclin Dependent Kinase Inhibitor 1A	P38936	4
CASP8	Caspase-8	Q14790	4
CASP9	Caspase 9	P55211	4
FASN	Fatty acid synthase	P49327	4
SERPINE1	Serpin Family E Member 1	P05121	4
SQLE	Squalene monooxygenase	Q14534	4
CDK4	Cyclin-dependent kinase 4	P11802	4
F3	coagulation factor III, tissue factor	P13726	4
PRKCE	Protein kinase C epsilon	Q02156	4
FYN	Tyrosine-protein kinase FYN	P06241	4
KDM4A	Lysine-specific demethylase 4A	O75164	4
FTO	Alpha-ketoglutarate-dependent dioxygenase FTO	Q9C0B1	4
KDM6B	Lysine-specific demethylase 6B	O15054	4
KDM3A	Lysine-specific demethylase 3A	Q9Y4C1	4
CYP1A2	cytochrome P450 family 1 subfamily A member 2	P05177	4
NFE2L2	Nuclear Factor, Erythroid 2 Like 2	Q16236	4
RXRA	Retinoic acid receptor RXR-alpha	P19793	4
BCL2	BCL2, Apoptosis Regulator	P10415	4
GABRA1	Gamma-aminobutyric acid receptor subunit alpha-1	P14867	4
ADRA1D	Alpha-1d adrenergic receptor	P25100	4
PLAU	Plasminogen Activator, Urokinase	P00749	4
ADRB1	Beta-1 adrenergic receptor	P08588	4
GCGR	Glucagon receptor	P47871	3
PSEN2 PSENEN NCSTN APH1A PSEN1 APH1B	Gamma-secretase	P49810 Q9NZ42 Q92542 Q96BI3 P49768 Q8WW43	3
ADORA2B	Adenosine A2b receptor	P29275	3
PLA2G7	LDL-associated phospholipase A2	Q13093	3
CACNA1C	Voltage-gated L-type calcium channel alpha-1C subunit	Q13936	3
FABP5	Fatty acid binding protein epidermal	Q01469	3
FABP3	Fatty acid binding protein muscle	P05413	3
FABP4	Fatty acid binding protein adipocyte	P15090	3
MGLL	Monoglyceride lipase	Q99685	3
KCNE1 KCNQ1	Voltage-gated potassium channel, IKs; KCNQ1(Kv7.1)/KCNE1(MinK)	P15382 P51787	3
LTB4R	Leukotriene B4 receptor 1	Q15722	3
PTGER2	Prostanoid EP2 receptor	P43116	3
ITGAL	Leukocyte adhesion glycoprotein LFA-1 alpha	P20701	3
SRD5A2	Steroid 5-alpha-reductase 2	P31213	3
PRKCH	Protein kinase C eta	P24723	3
FABP1	Fatty acid-binding protein, liver	P07148	3
CCR5	C-C chemokine receptor type 5	P51681	3
TRPM8	Transient receptor potential cation channel subfamily M member 8 (by homology)	Q7Z2W7	3
ROCK2	Rho-associated protein kinase 2	O75116	3
CSNK1D	Casein kinase I delta	P48730	3
RET	Kinesin-1 heavy chain/ Tyrosine-protein kinase receptor RET	P07949	3
HCRTR1	Orexin receptor 1	O43613	3
CASP1	Caspase-1	P29466	3
TRPV1	Vanilloid receptor	Q8NER1	3
DRD3	Dopamine D3 receptor	P35462	3
UTS2R	Urotensin II receptor	Q9UKP6	3
NTRK1	Nerve growth factor receptor Trk-A	P04629	3
CXCR2	Interleukin-8 receptor B	P25025	3
CNR1	Cannabinoid receptor 1 (by homology)	P21554	3
ERN1	Serine/threonine-protein kinase/endoribonuclease IRE1	O75460	3
MANBA	Beta-mannosidase	O00462	3
GAPDH	Glyceraldehyde-3-phosphate dehydrogenase liver	P04406	3
SLC5A2	Sodium/glucose cotransporter 2	P31639	3
OGA	Bifunctional protein NCOAT	O60502	3
LGALS9	Galectin-9	O00182	3
ADK	Adenosine kinase (by homology)	P55263	3
ADA	Adenosine deaminase	P00813	3
CTSL	Cathepsin L	P07711	3
EPHB4	Ephrin receptor	P54760	3
CFD	Complement factor D	P00746	3
CLK4	Dual specificity protein kinase CLK4	Q9HAZ1	3
CCR1	C-C chemokine receptor type 1	P32246	3
HK2	Hexokinase type II	P52789	3
PTGER3	Prostanoid EP3 receptor	P43115	3
NR1I2	Pregnane X receptor	O75469	3
MGAM	Maltase-glucoamylase	O43451	3
IGFBP3	Insulin-like growth factor binding protein 3	P17936	3
GSTM2	Glutathione S-transferase Mu 2	P28161	3
CTSD	Cathepsin D	P07339	3
MAPK3	MAP kinase ERK1	P27361	3
IL6	Interleukin-6	P05231	3
ERBB2	Receptor protein-tyrosine kinase erbB-2	P04626	3
ELANE	Leukocyte elastase	P08246	3
SLC2A4	Solute Carrier Family 2 Member 4	P14672	3
CCNB1	Cyclin B1	P14635	3
NFKBIA	NFKB Inhibitor Alpha	P25963	3
IFNG	interferon gamma	P01579	3
HIF1A	Hypoxia-inducible factor 1 alpha	Q16665	3
CD40LG	CD40 Ligand	P29965	3
CCND1	Cyclin D1	P24385	3
BAX	BCL2 Associated X, Apoptosis Regulator	Q07812	3
TRPA1	Transient receptor potential cation channel subfamily A member 1	O75762	3
DAO	D-amino-acid oxidase	P14920	3
MIF	Macrophage migration inhibitory factor	P14174	3
AHCY	Adenosylhomocysteinase	P23526	3
KDM2A	Lysine-specific demethylase 2A	Q9Y2K7	3
FBP1	Fructose-16-bisphosphatase	P09467	3
NGFR	Low affinity neurotrophin receptor p75NTR	P08138	3
TUBB1	Tubulin beta-1 chain	Q9H4B7	3
NQO2	Quinone reductase 2	P16083	3
CYP1A1	cytochrome P450 family 1 subfamily A member 1	P04798	3
TLR4	Toll-like receptor 4 (by homology)	O00206	3
GABRA6	Gamma-aminobutyric-acid receptor subunit alpha-6	Q16445	3
GABRA2	Gamma-aminobutyric-acid receptor alpha-2 subunit	P47869	3
CTRB1	chymotrypsinogen B1	P17538	3
ADRA2B	Alpha-2b adrenergic receptor	P18089	3
NR1H2	LXR-beta	P55055	2
CHRNA7	Neuronal acetylcholine receptor protein, alpha-7 chain	P36544	2
PER2	Period circadian protein homolog 2	O15055	2
SAE1 UBA2	SUMO-activating enzyme	Q9UBE0 Q9UBT2	2
VDR	Vitamin D receptor	P11473	2
RASGRP1	RAS guanyl-releasing protein 1 (by homology)	O95267	2
PRKCG	Protein kinase C gamma	P05129	2
ATP12A	Potassium-transporting ATPase alpha chain 2	P54707	2
PTAFR	Platelet activating factor receptor	P25105	2
MAP3K14	Mitogen-activated protein kinase kinase kinase 14	Q99558	2
JAK3 JAK1	JAK3/JAK1	P52333 P23458	2
CPB1	Carboxypeptidase B	P15086	2
MKNK2	MAP kinase signal-integrating kinase 2	Q9HBH9	2
HTR2B	Serotonin 2b (5-HT2b) receptor	P41595	2
HSD17B3	Estradiol 17-beta-dehydrogenase 3	P37058	2
CDK1 CCNB1	Cyclin-dependent kinase 1/cyclin B1	P06493 P14635	2
FAAH	Anandamide amidohydrolase	O00519	2
PDE4D	Phosphodiesterase 4D	Q08499	2
PTGIR	Prostanoid IP receptor	P43119	2
KMT5A	N-lysine methyltransferase SETD8	Q9NQR1	2
PTGDR	Prostanoid DP receptor	Q13258	2
PTGER4	Prostanoid EP4 receptor (by homology)	P35408	2
FDFT1	Squalene synthetase	P37268	2
TK1	Thymidine kinase, cytosolic	P04183	2
GPBAR1	G-protein coupled bile acid receptor 1	Q8TDU6	2
MAP3K5	Mitogen-activated protein kinase kinase kinase 5	Q99683	2
RBP4	Plasma retinol-binding protein	P02753	2
METAP2	Methionine aminopeptidase 2	P50579	2
SORD	Sorbitol dehydrogenase	Q00796	2
PARP3	Poly [ADP-ribose] polymerase 3	Q9Y6F1	2
TKT	Transketolase	P29401	2
CSNK1E	Casein kinase I epsilon	P49674	2
MTNR1B	Melatonin receptor 1B	P49286	2
MTNR1A	Melatonin receptor 1A	P48039	2
AURKA	Serine/threonine-protein kinase Aurora-A	O14965	2
PSEN2	Presenilin 2	P49810	2
PSEN1	Presenilin 1	P49768	2
MAPK10	c-Jun N-terminal kinase 3	P53779	2
IKBKB	Inhibitor of nuclear factor kappa B kinase beta subunit	O14920	2
PDPK1	3-phosphoinositide dependent protein kinase-1	O15530	2
PRKDC	DNA-dependent protein kinase	P78527	2
ALPL	Alkaline phosphatase, tissue-nonspecific isozyme	P05186	2
NPY5R	Neuropeptide Y receptor type 5	Q15761	2
NR1H4	Bile acid receptor FXR	Q96RI1	2
HTR2A	Serotonin 2a (5-HT2a) receptor	P28223	2
BDKRB1	Bradykinin B1 receptor	P46663	2
HK1	Hexokinase type I	P19367	2
TYMP	Thymidine phosphorylase	P19971	2
GAA	Lysosomal alpha-glucosidase	P10253	2
GRK1	Rhodopsin kinase	Q15835	2
HSPA8	Heat shock cognate 71 kDa protein	P11142	2
FUCA1	Alpha-L-fucosidase I	P04066	2
FOLH1	Glutamate carboxypeptidase II	Q04609	2
CDA	Cytidine deaminase	P32320	2
CDK9	Cyclin-dependent kinase 9	P50750	2
DYRK1B	Dual specificity tyrosine-phosphorylation-regulated kinase 1B	Q9Y463	2
PSMB5	Proteasome Macropain subunit MB1	P28074	2
CLK2	Dual specificity protein kinase CLK2	P49760	2
CLK1	Dual specificty protein kinase CLK1	P49759	2
GSK3A	Glycogen synthase kinase-3 alpha	P49840	2
PDGFRB	Platelet-derived growth factor receptor beta	P09619	2
CTSS	Cathepsin S	P25774	2
CTSK	Cathepsin K	P43235	2
SELE	Selectin E	P16581	2
HSPA5	78 kDa glucose-regulated protein	P11021	2
CHEK2	Serine/threonine-protein kinase Chk2	O96017	2
IL10	Interleukin 10	P22301	2
BIRC5	Baculoviral IAP repeat containing 5Â	O15392	2
CYP3A4	cytochrome P450 family 3 subfamily A member 4	P08684	2
PIK3CB	PI3-kinase p110-beta subunit	P42338	2
HERC5	HECT And RLD Domain Containing E3 Ubiquitin Protein Ligase 5	Q9UII4	2
AHSA1	Activator Of HSP90 ATPase Activity 1	O95433	2
PSMD3	Proteasome 26S Subunit, Non-ATPase 3	O43242	2
RUNX1T1	RUNX1 Translocation Partner 1	Q06455	2
XIAP	X-linked Inhibitor Of Apoptosis	P98170	2
IL4	interleukin 4	P05112	2
FOS	Fos Proto-oncogene, AP-1 Transcription Factor Subunit	P01100	2
EIF6	eukaryotic translation initiation factor 6	P56537	2
CDKN2A	Cyclin Dependent Kinase Inhibitor 2A	P42771	2
ACACA	Acetyl-CoA Carboxylase Alpha	Q13085	2
HAS2	Hyaluronan Synthase 2	Q92819	2
CAT	Catalase	P04040	2
HCAR2	Hydroxycarboxylic acid receptor 2	Q8TDS4	2
FASLG	Fas Ligand	P48023	2
FUT7	Alpha-(13)-fucosyltransferase 7	Q11130	2
TLR9	Toll-like receptor (TLR7/TLR9)	Q9NR96	2
NTRK2	Neurotrophic tyrosine kinase receptor type 2	Q16620	2
TAS2R31	Taste receptor type 2 member 31	P59538	2
PDE3A	phosphodiesterase 3A	Q14432	2
IGHG1	Ig gamma-1 chain C region	P01857	3
ADH1C	alcohol dehydrogenase 1C (class I), gamma polypeptide	P00326	2
PRSS3	serine protease 3	P35030	2
DRD1	Dopamine D1 receptor	P21728	2
STAT1	Signal Transducer And Activator Of Transcription 1	P42224	2
IRF1	Interferon Regulatory Factor 1	P10914	2
GRIA2	Glutamate receptor 2	P42262	3
PABPC1	Polyadenylate-binding protein 1	P11940	1
CDC25B	Dual specificity phosphatase Cdc25B	P30305	1
PREP	Prolyl endopeptidase	P48147	1
ABHD6	Monoacylglycerol lipase ABHD6	Q9BV23	1
SLC10A2	Ileal bile acid transporter	Q12908	1
PDF	Peptide deformylase mitochondrial	Q9HBH1	1
BMP1	Bone morphogenetic protein 1	P13497	1
TNK2	Tyrosine kinase non-receptor protein 2	Q07912	1
DUT	dUTP pyrophosphatase	P33316	1
GABRA4	Gamma-aminobutyric-acid receptor subunit alpha-4	P48169	1
GABRA5	Gamma-aminobutyric-acid receptor alpha-5 subunit	P31644	1
GSR	Glutathione reductase	P00390	1
DNTT	Terminal deoxynucleotidyltransferase	P04053	1
PGGT1B	Geranylgeranyl transferase type I beta subunit	P53609	1
HAO1	Hydroxyacid oxidase 1	Q9UJM8	1
IL6ST	Interleukin-6 receptor subunit beta	P40189	1
PTPRC	Leukocyte common antigen	P08575	1
CDC45	CDC45-related protein	O75419	1
KDM5C	Lysine-specific demethylase 5C	P41229	1
PHF8	Histone lysine demethylase PHF8	Q9UPP1	1
FABP2	Fatty acid binding protein intestinal	P12104	1
FFAR1	Free fatty acid receptor 1	O14842	1
GABRA2 GABRB2 GABRG2	GABA A receptor alpha-2/beta-2/gamma-2	P47869 P47870 P18507	1
GABBR1	GABA-B receptor (by homology)	Q9UBS5	1
HTR1D	Serotonin 1d (5-HT1d) receptor (by homology)	P28221	1
OAT	Ornithine aminotransferase, mitochondrial	P04181	1
SCD	Acyl-CoA desaturase	O00767	1
CES1	Acyl coenzyme A:cholesterol acyltransferase	P23141	1
PIN1	Peptidyl-prolyl cis-trans isomerase NIMA-interacting 1	Q13526	1
LGALS3	Galectin-3	P17931	1
CCND1 CDK4	Cyclin-dependent kinase 4/cyclin D1	P24385 P11802	1
SSTR3	Somatostatin receptor 3	P32745	1
SSTR1	Somatostatin receptor 1	P30872	1
SSTR4	Somatostatin receptor 4	P31391	1
SSTR2	Somatostatin receptor 2	P30874	1
SSTR5	Somatostatin receptor 5	P35346	1
CDK9 CCNT1	CDK9/cyclin T1	P50750 O60563	1
CDK2 CCNA1 CCNA2	Cyclin-dependent kinase 2/cyclin A	P24941 P78396 P20248	1
PNP	Purine nucleoside phosphorylase	P00491	1
HPSE	Heparanase	Q9Y251	1
FGF2	Basic fibroblast growth factor	P09038	1
FGF1	Acidic fibroblast growth factor	P05230	1
ADRB3	Beta-3 adrenergic receptor	P13945	1
TBXA2R	Thromboxane A2 receptor	P21731	1
PCSK7	Subtilisin/kexin type 7	Q16549	1
TRPV4	Transient receptor potential cation channel subfamily V member 4 (by homology)	Q9HBA0	1
VAV1	Proto-oncogene vav	P15498	1
CTRC	Chymotrypsin C	Q99895	1
IARS	Isoleucyl-tRNA synthetase	P41252	1
PGGT1B FNTA	Geranylgeranyl transferase type I	P53609 P49354	1
TACR2	Neurokinin 2 receptor	P21452	1
PIK3CA PIK3R1	PI3-kinase p110-alpha/p85-alpha	P42336 P27986	1
PTGER1	Prostanoid EP1 receptor	P34995	1
CASP2	Caspase-2	P42575	1
CASP6	Caspase-6	P55212	1
PDE5A	Phosphodiesterase 5A	O76074	1
MKNK1	MAP kinase-interacting serine/threonine-protein kinase MNK1	Q9BUB5	1
ILK	Serine/threonine-protein kinase ILK-1	Q13418	1
RPS6KA5	Ribosomal protein S6 kinase alpha 5	O75582	1
MAPKAPK2	MAP kinase-activated protein kinase 2	P49137	1
GLUL	Glutamine synthetase	P15104	1
NUDT1	7,8-dihydro-8-oxoguanine triphosphatase	P36639	1
PARP2	Poly [ADP-ribose] polymerase 2	Q9UGN5	1
AVPR1A	Vasopressin V1a receptor	P37288	1
GRM1	Metabotropic glutamate receptor 1	Q13255	1
ASAH1	Acid ceramidase (by homology)	Q13510	1
MAPK9	c-Jun N-terminal kinase 2	P45984	1
PDE4B	Phosphodiesterase 4B	Q07343	1
MAPK8	c-Jun N-terminal kinase 1	P45983	1
GRM5	Metabotropic glutamate receptor 5	P41594	1
BRD3	Bromodomain-containing protein 3	Q15059	1
RPS6KB1	Ribosomal protein S6 kinase 1	P23443	1
PDE2A	Phosphodiesterase 2A	O00408	1
KIF11	Kinesin-like protein 1	P52732	1
PIM2	Serine/threonine-protein kinase PIM2	Q9P1W9	1
MAP2K2	Dual specificity mitogen-activated protein kinase kinase 2	P36507	1
ITK	Tyrosine-protein kinase ITK/TSK	Q08881	1
MAP2K4	Dual specificity mitogen-activated protein kinase kinase 4	P45985	1
MAP3K9	Mitogen-activated protein kinase kinase kinase 9	P80192	1
CAMK2D	CaM kinase II	Q13557	1
CSNK1A1	Casein kinase I alpha	P48729	1
MYLK2	myosin light chain kinase 2	Q9H1R3	1
FGFR3	Fibroblast growth factor receptor 3	P22607	1
MAP3K11	Mitogen-activated protein kinase kinase kinase 11	Q16584	1
PRKD3	Protein kinase C (PKC)	O94806	1
RPS6KA1	Ribosomal protein S6 kinase alpha 1	Q15418	1
CSNK1G2	Casein kinase I gamma 2	P78368	1
CAMK4	CaM kinase IV	Q16566	1
CAMK1	CaM kinase I alpha	Q14012	1
DAPK3	Death-associated protein kinase 3	O43293	1
CSNK1G1	Casein kinase I gamma 1	Q9HCP0	1
PHKG2	Phosphorylase kinase gamma subunit 2	P15735	1
RPS6KA3	Ribosomal protein S6 kinase alpha 3	P51812	1
BLK	Tyrosine-protein kinase BLK	P51451	1
MAP2K6	Dual specificity mitogen-activated protein kinase kinase 6	P52564	1
PRKAA2	AMP-activated protein kinase, alpha-2 subunit	P54646	1
MAP2K3	Dual specificity mitogen-activated protein kinase kinase 3	P46734	1
YES1	Tyrosine-protein kinase YES	P07947	1
PDGFRA	Platelet-derived growth factor receptor alpha	P16234	1
FLT4	Vascular endothelial growth factor receptor 3	P35916	1
MAP3K12	Mitogen-activated protein kinase kinase kinase 12	Q12852	1
DSTYK	Dual serine/threonine and tyrosine protein kinase	Q6XUX3	1
SNRK	SNF-related serine/threonine-protein kinase	Q9NRH2	1
PRPF4B	Serine/threonine-protein kinase PRP4 homolog	Q13523	1
FLT1	Vascular endothelial growth factor receptor 1	P17948	1
ABL1	Tyrosine-protein kinase ABL	P00519	1
CSF1R	Macrophage colony stimulating factor receptor	P07333	1
HUNK	Hormonally up-regulated neu tumor-associated kinase	P57058	1
SBK1	Serine/threonine-protein kinase SBK1	Q52WX2	1
MAST1	Microtubule-associated serine/threonine-protein kinase 1	Q9Y2H9	1
MAP3K15	Mitogen-activated protein kinase kinase kinase 15	Q6ZN16	1
ICK	Serine/threonine-protein kinase ICK	Q9UPZ9	1
MAP3K13	Mitogen-activated protein kinase kinase kinase 13	O43283	1
STK39	STE20/SPS1-related proline-alanine-rich protein kinase	Q9UEW8	1
OXSR1	Serine/threonine-protein kinase OSR1	O95747	1
HIPK4	Homeodomain-interacting protein kinase 4	Q8NE63	1
STK38	Serine/threonine-protein kinase 38	Q15208	1
GRK7	G protein-coupled receptor kinase 7	Q8WTQ7	1
SCN9A	Sodium channel protein type IX alpha subunit	Q15858	1
ADCY1	Brain adenylate cyclase 1	Q08828	1
IDH1	Isocitrate dehydrogenase [NADP] cytoplasmic	O75874	1
CAPN1	Calpain 1	P07384	1
CAPN2	Calpain 2	P17655	1
GCK	Hexokinase type IV	P35557	1
CALCRL	Calcitonin gene-related peptide type 1 receptor	Q16602	1
PDE1C	Phosphodiesterase 1C	Q14123	1
PDE9A	Phosphodiesterase 9A	O76083	1
CTSB	Cathepsin (B and K)	P07858	1
CTSV	Cathepsin (V and K)	O60911	1
PIK3CD	PI3-kinase p110-delta subunit	O00329	1
DGAT1	Diacylglycerol O-acyltransferase 1	O75907	1
C5AR1	C5a anaphylatoxin chemotactic receptor	P21730	1
ECE1	Endothelin-converting enzyme 1	P42892	1
HPRT1	Hypoxanthine-guanine phosphoribosyltransferase	P00492	1
TTL	Tubulin--tyrosine ligase	Q8NG68	1
SLC5A1	Sodium/glucose cotransporter 1	P13866	1
DTYMK	Thymidylate kinase	P23919	1
GLI1	Zinc finger protein GLI1	P08151	1
HRAS	Transforming protein p21/H-Ras-1	P01112	1
AMPD3	AMP deaminase 3	Q01432	1
PPP2R5A	Serine/threonine protein phosphatase 2A, 56 kDa regulatory subunit, alpha isoform	Q15172	1
PPP2CA	Serine/threonine protein phosphatase 2A, catalytic subunit, alpha isoform	P67775	1
PPP1CC	Serine/threonine protein phosphatase PP1-gamma catalytic subunit	P36873	1
PFKFB3	6-phosphofructo-2-kinase/fructose-2, 6-bisphosphatase 3	Q16875	1
IMPDH1	Inosine-5'-monophosphate dehydrogenase 1	P20839	1
DCAF5	DDB1 And CUL4 Associated Factor 5	Q96JK2	1
SPP1	Secreted Phosphoprotein 1	P10451	1
SOD3	Superoxide Dismutase 3	P08294	1
PCOLCE	Procollagen C-endopeptidase Enhancer	Q15113	1
CXCL11	C-X-C Motif Chemokine Ligand 11	O14625	1
NKX3-1	NK3 Homeobox 1	Q99801	1
CXCL2	C-X-C Motif Chemokine Ligand 2	P19875	1
CLDN4	Claudin 4	O14493	1
E2F2	E2F Transcription Factor 2	Q14209	1
E2F1	E2F Transcription Factor 1	Q01094	1
DIO1	Iodothyronine Deiodinase 1	P49895	1
ELK1	ELK1, ETS Transcription Factor	P19419	1
VCAM1	vascular cell adhesion molecule 1	P19320	1
THBD	Thrombomodulin	P07204	1
TGFB1	Transforming Growth Factor Beta 1	P01137	1
SULT1E1	sulfotransferase family 1E member 1	P49888	1
SOD1	Superoxide Dismutase 1	P00441	1
RUNX2	Runt Related Transcription Factor 2	Q13950	1
RASSF1	Ras Association Domain Family Member 1	Q9NS23	1
RASA1	RAS P21 Protein Activator 1	P20936	1
RAF1	Raf-1 Proto-oncogene, Serine/threonine Kinase	P04049	1
PTEN	Phosphatase And Tensin Homolog	P60484	1
POR	Cytochrome P450 Oxidoreductase	P16435	1
PON1	Paraoxonase 1	P27169	1
PLAT	Plasminogen Activator, Tissue Type	P00750	1
NQO1	NAD(P)H quinone dehydrogenase 1	P15559	1
NPEPPS	aminopeptidase puromycin sensitive	P55786	1
NCF1	Neutrophil Cytosolic Factor 1	P14598	1
MYC	MYC Proto-oncogene, BHLH Transcription Factor	P01106	1
IL1B	interleukin 1 beta	P01584	1
IL1A	interleukin 1 alpha	P01583	1
IGF2	Insulin Like Growth Factor 2	P01344	1
HSPB1	Heat Shock Protein Family B (small) Member 1	P04792	1
HSF1	heat shock transcription factor 1	Q00613	1
GSTM1	glutathione S-transferase mu 1	P09488	1
GJA1	Gap Junction Protein Alpha 1	P17302	1
ERBB3	Erb-b2 Receptor Tyrosine Kinase 3	P21860	1
EGF	Epidermal Growth Factor	P01133	1
DUOX2	Dual Oxidase 2	Q9NRD8	1
CXCL8	C-X-C motif chemokine ligand 8	P10145	1
CXCL10	C-X-C motif chemokine ligand 10	P02778	1
CRP	C-reactive protein	P02741	1
COL3A1	Collagen Type III Alpha 1 Chain	P02461	1
COL1A1	Collagen Type I Alpha 1 Chain	P02452	1
CHUK	Conserved Helix-loop-helix Ubiquitous Kinase	O15111	1
CCL2	C-C motif chemokine ligand 2	P13500	1
CAV1	Caveolin 1	Q03135	1
BMP2	Bone Morphogenetic Protein 2	P12643	1
ACPP	acid phosphatase, prostate	P15309	1
NUF2	NUF2, NDC80 Kinetochore Complex Component	Q9BZD4	1
PCNA	Proliferating Cell Nuclear Antigen	P12004	1
ADCY2	adenylate cyclase 2 (brain)	Q08462	1
PYGM	glycogen phosphorylase, muscle associated	P11217	1
KCNMA1	potassium calcium-activated channel subfamily M alpha 1	Q12791	1
CTRB1	chymotrypsinogen B1	P17538	1
CTBP2	C-terminal-binding protein 2	P56545	1
CDC2	Cell Division Control Protein 2 Homolog	P06493	1
ALG5	ALG5, Dolichyl-phosphate Beta-glucosyltransferase	Q9Y673	1
EEF1E1	Eukaryotic Translation Elongation Factor 1 Epsilon 1	O43324	1
CFLAR	CASP8 And FADD Like Apoptosis Regulator	O15519	1
PSME3	Proteasome Activator Subunit 3	P61289	1
TRPM2	Transient Receptor Potential Cation Channel Subfamily M Member 2	O94759	1
ALPI	Alkaline Phosphatase, Intestinal	P09923	1
SLC5A5	Solute Carrier Family 5 Member 5	Q92911	1
MS4A2	membrane spanning 4-domains A2	Q01362	1
INS	Insulin	P01308	1
IL13	interleukin 13	P35225	1
IKBKG	Inhibitor Of Nuclear Factor Kappa B Kinase Subunit Gamma	Q9Y6K9	1
G6PC	Glucose-6-phosphatase Catalytic Subunit	P35575	1
FXYD2	FXYD Domain Containing Ion Transport Regulator 2	P54710	1
FCER2	Fc fragment of IgE receptor II	P06734	1
CYCS	Cytochrome C, Somatic	P99999	1
CCND2	Cyclin D2	P30279	1
CCNA2	cyclin A2	P20248	1
BAD	BCL2 associated agonist of cell death	Q92934	1
APC	APC, WNT Signaling Pathway Regulator	P25054	1
AAGAB	Alpha And Gamma Adaptin Binding Protein	Q6PD74	1
HTR2C	Serotonin 2c (5-HT2c) receptor	P28335	1
TBXAS1	Thromboxane-A synthase	P24557	1
KLF7	Kruppel Like Factor 7	O75840	1
PLA2G2E	phospholipase A2 group IIE	Q9NZK7	1
CCL16	C-C Motif Chemokine Ligand 16	O15467	1
TYRP1	Tyrosinase Related Protein 1	P17643	1
POLA1	DNA polymerase alpha subunit	P09884	1
ATMIN	ATM Interactor	O43313	1
SULT1A1	sulfotransferase family 1A member 1	P50225	1
MGST1	microsomal glutathione S-transferase 1	P10620	1
EPHX1	Epoxide Hydrolase 1	P07099	1
CYP3A43	cytochrome P450 family 3 subfamily A member 43	Q9HB55	1
COMT	Catechol O-methyltransferase (by homology)	P21964	1
LDHB	L-lactate dehydrogenase B chain	P07195	1
LDHA	L-lactate dehydrogenase A chain	P00338	1
ESRRG	Estrogen-related receptor gamma	P62508	1
SLC13A5	Solute carrier family 13 member 5	Q86YT5	1
CTNNB1	Axin1/beta-catenin	P35222	1
REN	Renin	P00797	1
ACE	Angiotensin-converting enzyme (by homology)	P12821	1
TUBB3	Tubulin beta-3 chain	Q13509	1
SLC16A1	Monocarboxylate transporter 1 (by homology)	P53985	1
CPA1	Carboxypeptidase A1	P15085	1
inducible	Nitric oxide synthase	NOS2	1
GABRA3	gamma-aminobutyric acid type A receptor alpha3 subunit	P34903	1
