# Supplementary material for: Constitution of a comprehensive phytochemical profile and network pharmacology based investigation to decipher molecular mechanisms of Teucrium polium L. in the treatment of type 2 diabetes mellitus
Source: PeerJ. 2020 Oct 22;8:e10111. doi: 10.7717/peerj.10111 (PMC7585722; doi:10.7717/peerj.10111)
Supplement: Supplemental Information 3 [file peerj-08-10111-s003.xlsx]

## Sheet: Page 1
Gene Symbol	Gene Name	Uniprot ID
ABCB1	P-glycoprotein 1	P08183
ABCG2	ATP-binding cassette sub-family G member 2	Q9UNQ0
ABHD6	Monoacylglycerol lipase ABHD6	Q9BV23
ACACA	Acetyl-CoA Carboxylase Alpha	Q13085
ACE	Angiotensin-converting enzyme (by homology)	P12821
ACP1	Low molecular weight phosphotyrosine protein phosphatase	P24666
ADA	Adenosine deaminase	P00813
ADAM17	Disintegrin and metalloproteinase domain-containing protein 17	P78536
ADH1C	alcohol dehydrogenase 1C (class I), gamma polypeptide	P00326
ADORA1	Adenosine A1 receptor (by homology)	P30542
ADORA2B	Adenosine A2b receptor	P29275
ADORA3	Adenosine A3 receptor	P0DMS8
ADRA1A	Alpha-1a adrenergic receptor	P35348
ADRA2A	Alpha-2a adrenergic receptor	P08913
ADRA2B	Alpha-2b adrenergic receptor	P18089
ADRB2	Beta-2 adrenergic receptor	P07550
ADRB3	Beta-3 adrenergic receptor	P13945
AHR	Aryl hydrocarbon receptor	P35869
AHSA1	Activator Of HSP90 ATPase Activity 1	O95433
AKR1A1	Aldehyde reductase (by homology)	P14550
AKR1B1	Aldose reductase (by homology)	P15121
AKT1	Serine/threonine-protein kinase AKT	P31749
ALK	ALK tyrosine kinase receptor	Q9UM73
ALOX12	Arachidonate 12-lipoxygenase	P18054
ALOX15	Arachidonate 15-lipoxygenase	P16050
ALOX5	Arachidonate 5-lipoxygenase	P09917
AOC3	Amine oxidase, copper containing	Q16853
APP	Beta amyloid A4 protein	P05067
AR	Androgen Receptor	P10275
BACE1	Beta-secretase 1	P56817
BACE2	Beta secretase 2	Q9Y5Z0
BAD	BCL2 associated agonist of cell death	Q92934
BAX	BCL2 Associated X, Apoptosis Regulator	Q07812
BCHE	Butyrylcholinesterase	P06276
BCL2	BCL2, Apoptosis Regulator	P10415
BCL2L1	Apoptosis regulator Bcl-X	Q07817
BLK	Tyrosine-protein kinase BLK	P51451
BRD2	Bromodomain-containing protein 2	P25440
CACNA1C	Voltage-gated L-type calcium channel alpha-1C subunit	Q13936
CALM1	Calmodulin	P62158
CAPN1	Calpain 1	P07384
CAPN2	Calpain 2	P17655
CASP3	Caspase-3	P42574
CASP7	Caspase-7	P55210
CASP8	Caspase-8	Q14790
CAT	Catalase	P04040
CAV1	Caveolin 1	Q03135
CCL2	C-C motif chemokine ligand 2	P13500
CCND2	Cyclin D2	P30279
CCR1	C-C chemokine receptor type 1	P32246
CCR5	C-C chemokine receptor type 5	P51681
CD38	Lymphocyte differentiation antigen CD38	P28907
CD40LG	CD40 Ligand	P29965
CDK4	Cyclin-dependent kinase 4	P11802
CDKN1A	Cyclin Dependent Kinase Inhibitor 1A	P38936
CDKN2A	Cyclin Dependent Kinase Inhibitor 2A	P42771
CES1	Acyl coenzyme A:cholesterol acyltransferase	P23141
CFD	Complement factor D	P00746
CFTR	Cystic fibrosis transmembrane conductance regulator	P13569
CHEK2	Serine/threonine-protein kinase Chk2	O96017
CHRM3	Muscarinic acetylcholine receptor M3	P20309
CNR1	Cannabinoid receptor 1 (by homology)	P21554
CNR2	Cannabinoid receptor 2	P34972
COL3A1	Collagen Type III Alpha 1 Chain	P02461
COMT	Catechol O-methyltransferase (by homology)	P21964
CRP	C-reactive protein	P02741
CTSL	Cathepsin L	P07711
CXCL10	C-X-C motif chemokine ligand 10	P02778
CXCL8	C-X-C motif chemokine ligand 8	P10145
CXCR1	Interleukin-8 receptor A	P25024
CYP11B2	Cytochrome P450 11B2	P19099
CYP17A1	Cytochrome P450 17A1	P05093
CYP19A1	Cytochrome P450 19A1	P11511
CYP1A1	cytochrome P450 family 1 subfamily A member 1	P04798
CYP1A2	cytochrome P450 family 1 subfamily A member 2	P05177
CYP1B1	Cytochrome P450 1B1	Q16678
CYP2C19	Cytochrome P450 2C19	P33261
CYP2C9	Cytochrome P450 2C9	P11712
CYP3A4	cytochrome P450 family 3 subfamily A member 4	P08684
DGAT1	Diacylglycerol O-acyltransferase 1	O75907
DPP4	Dipeptidyl peptidase IV	P27487
DRD2	Dopamine D2 receptor (by homology)	P14416
ECE1	Endothelin-converting enzyme 1	P42892
EDNRA	Endothelin receptor ET-A (by homology)	P25101
EGFR	Epidermal growth factor receptor erbB1	P00533
EPHX1	Epoxide Hydrolase 1	P07099
ESR1	Estrogen receptor alpha	P03372
ESRRA	Estrogen-related receptor alpha	P11474
ESRRG	Estrogen-related receptor gamma	P62508
F2	Thrombin	P00734
F3	coagulation factor III, tissue factor	P13726
F7	Coagulation factor VII	P08709
FAAH	Anandamide amidohydrolase	O00519
FABP1	Fatty acid-binding protein, liver	P07148
FABP2	Fatty acid binding protein intestinal	P12104
FABP3	Fatty acid binding protein muscle	P05413
FABP4	Fatty acid binding protein adipocyte	P15090
FABP5	Fatty acid binding protein epidermal	Q01469
FASN	Fatty acid synthase	P49327
FFAR1	Free fatty acid receptor 1	O14842
FGF2	Basic fibroblast growth factor	P09038
FLT1	Vascular endothelial growth factor receptor 1	P17948
FTO	Alpha-ketoglutarate-dependent dioxygenase FTO	Q9C0B1
G6PC	Glucose-6-phosphatase Catalytic Subunit	P35575
G6PD	Glucose-6-phosphate 1-dehydrogenase	P11413
GAA	Lysosomal alpha-glucosidase	P10253
GAPDH	Glyceraldehyde-3-phosphate dehydrogenase liver	P04406
GCGR	Glucagon receptor	P47871
GCK	Hexokinase type IV	P35557
GJA1	Gap Junction Protein Alpha 1	P17302
GLO1	Glyoxalase I	Q04760
GLUL	Glutamine synthetase	P15104
GPBAR1	G-protein coupled bile acid receptor 1	Q8TDU6
GPR35	G-protein coupled receptor 35	Q9HC97
GSK3B	Glycogen synthase kinase-3 beta	P49841
GSTM1	glutathione S-transferase mu 1	P09488
GSTP1	Glutathione S-transferase Pi	P09211
HCAR2	Hydroxycarboxylic acid receptor 2	Q8TDS4
HIF1A	Hypoxia-inducible factor 1 alpha	Q16665
HK1	Hexokinase type I	P19367
HK2	Hexokinase type II	P52789
HMGCR	HMG-CoA reductase	P04035
HMOX1	Heme oxygenase 1 (by homology)	P09601
HPSE	Heparanase	Q9Y251
HRAS	Transforming protein p21/H-Ras-1	P01112
HSD11B1	11-beta-hydroxysteroid dehydrogenase 1	P28845
HSD17B3	Estradiol 17-beta-dehydrogenase 3	P37058
HSPA5	78 kDa glucose-regulated protein	P11021
HTR2A	Serotonin 2a (5-HT2a) receptor	P28223
HTR2C	Serotonin 2c (5-HT2c) receptor	P28335
IARS	Isoleucyl-tRNA synthetase	P41252
ICAM1	Intercellular adhesion molecule-1	P05362
IFNG	interferon gamma	P01579
IGF1R	Insulin-like growth factor I receptor	P08069
IGF2	Insulin Like Growth Factor 2	P01344
IGFBP3	Insulin-like growth factor binding protein 3	P17936
IL10	Interleukin 10	P22301
IL13	interleukin 13	P35225
IL1A	interleukin 1 alpha	P01583
IL1B	interleukin 1 beta	P01584
IL2	Interleukin-2	P60568
IL4	interleukin 4	P05112
IL6	Interleukin-6	P05231
IL6ST	Interleukin-6 receptor subunit beta	P40189
ILK	Serine/threonine-protein kinase ILK-1	Q13418
INS	Insulin	P01308
INSR	Insulin receptor	P06213
JAK1	Tyrosine-protein kinase JAK1	P23458
JAK2	Tyrosine-protein kinase JAK2	O60674
KDR	Vascular endothelial growth factor receptor 2	P35968
KIF11	Kinesin-like protein 1	P52732
KLF7	Kruppel Like Factor 7	O75840
LDHA	L-lactate dehydrogenase A chain	P00338
MAOA	Monoamine oxidase A	P21397
MAP3K5	Mitogen-activated protein kinase kinase kinase 5	Q99683
MAPK1	MAP kinase ERK2	P28482
MAPK14	MAP kinase p38 alpha	Q16539
MAPK8	c-Jun N-terminal kinase 1	P45983
MGAM	Maltase-glucoamylase	O43451
MGLL	Monoglyceride lipase	Q99685
MIF	Macrophage migration inhibitory factor	P14174
MME	Neprilysin	P08473
MMP1	Matrix metalloproteinase 1	P03956
MMP14	Matrix metalloproteinase 14	P50281
MMP2	Matrix metalloproteinase 2	P08253
MMP3	Matrix metalloproteinase 3	P08254
MMP7	Matrix metalloproteinase 7	P09237
MMP8	Matrix metalloproteinase 8	P22894
MMP9	Matrix metalloproteinase 9	P14780
MTNR1A	Melatonin receptor 1A	P48039
MTNR1B	Melatonin receptor 1B	P49286
MTOR	Serine/threonine-protein kinase mTOR	P42345
NFE2L2	Nuclear Factor, Erythroid 2 Like 2	Q16236
NOS2	Nitric oxide synthase, inducible	P35228
NOS3	Nitric-oxide synthase, endothelial	P29474
NPC1L1	Niemann-Pick C1-like protein 1	Q9UHC9
NQO1	NAD(P)H quinone dehydrogenase 1	P15559
NR1H2	LXR-beta	P55055
NR1H3	LXR-alpha	Q13133
NR1H4	Bile acid receptor FXR	Q96RI1
NR1I2	Pregnane X receptor	O75469
NR1I3	Nuclear receptor subfamily 1 group I member 3 (by homology)	Q14994
NR3C1	Glucocorticoid receptor	P04150
NTRK1	Nerve growth factor receptor Trk-A	P04629
OGA	Bifunctional protein NCOAT	O60502
OPRM1	Mu opioid receptor (by homology)	P35372
P2RX7	P2X purinoceptor 7	Q99572
PARP1	Poly [ADP-ribose] polymerase-1	P09874
PER2	Period circadian protein homolog 2	O15055
PIK3CA	PI3-kinase p110-alpha subunit	P42336
PIK3CB	PI3-kinase p110-beta subunit	P42338
PIK3CD	PI3-kinase p110-delta subunit	O00329
PIK3CG	PI3-kinase p110-gamma subunit	P48736
PIK3R1	PI3-kinase p85-alpha subunit	P27986
PLA2G1B	Phospholipase A2 group 1B	P04054
PLA2G2A	Phospholipase A2 group IIA	P14555
PLAT	Plasminogen Activator, Tissue Type	P00750
PLG	Plasminogen	P00747
PON1	Paraoxonase 1	P27169
PPARA	Peroxisome proliferator-activated receptor alpha	Q07869
PPARD	Peroxisome proliferator-activated receptor delta	Q03181
PPARG	Peroxisome proliferator-activated receptor gamma	P37231
PPP2CA	Serine/threonine protein phosphatase 2A, catalytic subunit, alpha isoform	P67775
PRKAA2	AMP-activated protein kinase, alpha-2 subunit	P54646
PRKCB	Protein kinase C beta	P05771
PSEN1	Presenilin 1	P49768
PTEN	Phosphatase And Tensin Homolog	P60484
PTGS2	Prostaglandin G/H synthase 2	P35354
PTPN1	Protein-tyrosine phosphatase 1B	P18031
PTPRS	Receptor-type tyrosine-protein phosphatase S	Q13332
RASGRP1	RAS guanyl-releasing protein 1 (by homology)	O95267
RBP4	Plasma retinol-binding protein	P02753
RELA	RELA proto-oncogene, NF-kB subunit	Q04206
REN	Renin	P00797
RORC	Nuclear receptor ROR-gamma	P51449
RPS6KA3	Ribosomal protein S6 kinase alpha 3	P51812
RPS6KB1	Ribosomal protein S6 kinase 1	P23443
RUNX2	Runt Related Transcription Factor 2	Q13950
SCD	Acyl-CoA desaturase	O00767
SELE	Selectin E	P16581
SERPINE1	Serpin Family E Member 1	P05121
SHBG	Testis-specific androgen-binding protein	P04278
SLC22A12	Solute carrier family 22 member 12	Q96S37
SLC2A4	Solute Carrier Family 2 Member 4	P14672
SLC5A1	Sodium/glucose cotransporter 1	P13866
SLC5A2	Sodium/glucose cotransporter 2	P31639
SLC6A2	Norepinephrine transporter	P23975
SLC6A4	Serotonin transporter	P31645
SOD1	Superoxide Dismutase 1	P00441
SOD3	Superoxide Dismutase 3	P08294
SORD	Sorbitol dehydrogenase	Q00796
SPP1	Secreted Phosphoprotein 1	P10451
SRC	Tyrosine-protein kinase SRC	P12931
SREBF2	Sterol regulatory element-binding protein 2	Q12772
SSTR4	Somatostatin receptor 4	P31391
ST6GAL1	Beta-galactoside alpha-2,6-sialyltransferase 1	P15907
STAT3	Signal transducer and activator of transcription 3	P40763
SULT1A1	sulfotransferase family 1A member 1	P50225
TGFB1	Transforming Growth Factor Beta 1	P01137
THBD	Thrombomodulin	P07204
TLR4	Toll-like receptor 4 (by homology)	O00206
TLR9	Toll-like receptor (TLR7/TLR9)	Q9NR96
TNF	TNF-alpha	P01375
TNKS2	Tankyrase-2	Q9H2K2
TP53	Tumor Protein P53	P04637
TRPM2	Transient Receptor Potential Cation Channel Subfamily M Member 2	O94759
TTR	Transthyretin	P02766
TYMP	Thymidine phosphorylase	P19971
UTS2R	Urotensin II receptor	Q9UKP6
VCAM1	vascular cell adhesion molecule 1	P19320
VDR	Vitamin D receptor	P11473
VEGFA	Vascular endothelial growth factor A	P15692
